# Supplementary material
Source: publisher figshare collection journal article supplement (https://acs.figshare.com/ndownloader/files/4742080)
Supplement: Supplementary file 1 [file 4742080]

## Supporting Information

### Water penetration into protein secondary structure revealed by hydrogen-deuterium exchange 2D IR spectroscopy

Lauren P. DeFlores and Andrei Tokmakoff\*

*Department of Chemistry, Massachusetts Institute of Technology, Cambridge, Massachusetts 02139*

[tokmakof@mit.edu](mailto:tokmakof@mit.edu)

Absorptive 2D IR spectra were acquired using methods and instrumentation that is described in detail elsewhere.<sup>1</sup> The experiments used 1  $\mu\text{J}$ , 90 fs pulsed mid-IR radiation centered at  $1600\text{ cm}^{-1}$ . The pulse bandwidth of  $185\text{ cm}^{-1}$  (FWHM) is centered to cover both the fundamental ( $\nu=0\rightarrow 1$ ) and anharmonically shifted ( $\nu=1\rightarrow 2$ ) overtones of both the amide I/I' and amide II modes of the proteins shown in Figure 1 and 1S. Data is collected in frequency ( $\omega_3$ ) and time ( $\tau_1$ ) and numerically transformed along  $\tau_1$  to obtain  $\omega_1$ . The resolution along  $\omega_3$  is dictated by grating dispersion and the size of the 64 pixels on the MCT array detector, and in this experiment is  $4\text{ cm}^{-1}$ .  $\omega_1$  resolution is determined by the total time delay swept in  $\tau_1$  and is  $0.5\text{ cm}^{-1}$ . Spectra shown were acquired in the crossed (ZZYY) polarization geometry to enhance to relative intensity of the cross peaks.<sup>2</sup>

Two-dimensional infrared spectra were taken of seven protein systems with various degrees of secondary structural motifs: concanavalin A (Con A,  $\beta$ -protein),  $\beta$ -lactoglobulin (BLG,  $\alpha/\beta$   $\beta$ -sandwich protein), ribonuclease A (RNaseA,  $\alpha/\beta$ -protein), ubiquitin ( $\alpha/\beta$ -protein), lysozyme ( $\alpha/\beta$ -protein), Myoglobin ( $\alpha$ -protein), and serum albumin ( $\alpha$ -protein). Experimental conditions were chosen to minimize H/D exchange through the course of data collection ( $\sim 20$  minutes). Samples are held between two  $\text{CaF}_2$  windows with a  $50\text{ }\mu\text{m}$  spacer in a water cooled brass sample cell. Proteins were monitored at various temperatures over a 2 hour period using FTIR spectroscopy to ensure the amide II band did not change. The ideal temperature was determined to be  $5\text{ }^\circ\text{C}$  for all proteins. The samples were rapidly prepared at  $10\text{ }^\circ\text{C}$  to avoid condensation of atmospheric water onto the sample cell and windows, and then cooled to  $5\text{ }^\circ\text{C}$  once in the dry air purged spectrometer. Con A, BLG, RNaseA, and myoglobin were prepared in a  $\text{pD} = 7.6$  phosphate/ $\text{D}_2\text{O}$  buffer, lysozyme in a  $\text{pD} = 5.5$  phosphate/ $\text{D}_2\text{O}$  buffer, albumin in a  $\text{pD} = 7.3$  phosphate/ $\text{D}_2\text{O}$  buffer, and ubiquitin was prepared at  $\text{pH} = 1.0$  using  $\text{DCl}/\text{D}_2\text{O}$ . Sample concentrations ranged between 20-30 mg/ml such that the OD of the amide II transition is  $\sim 0.1$ .

The FTIR and absorptive 2D IR spectra for all proteins are shown in Figure 1S to show trends in the cross peak region. The 2D IR spectra presented in this manuscript have not been corrected for pulse spectral intensity in either  $\omega_1$  or  $\omega_3$  dimensions, creating an enhancement of features around  $1600\text{ cm}^{-1}$ .

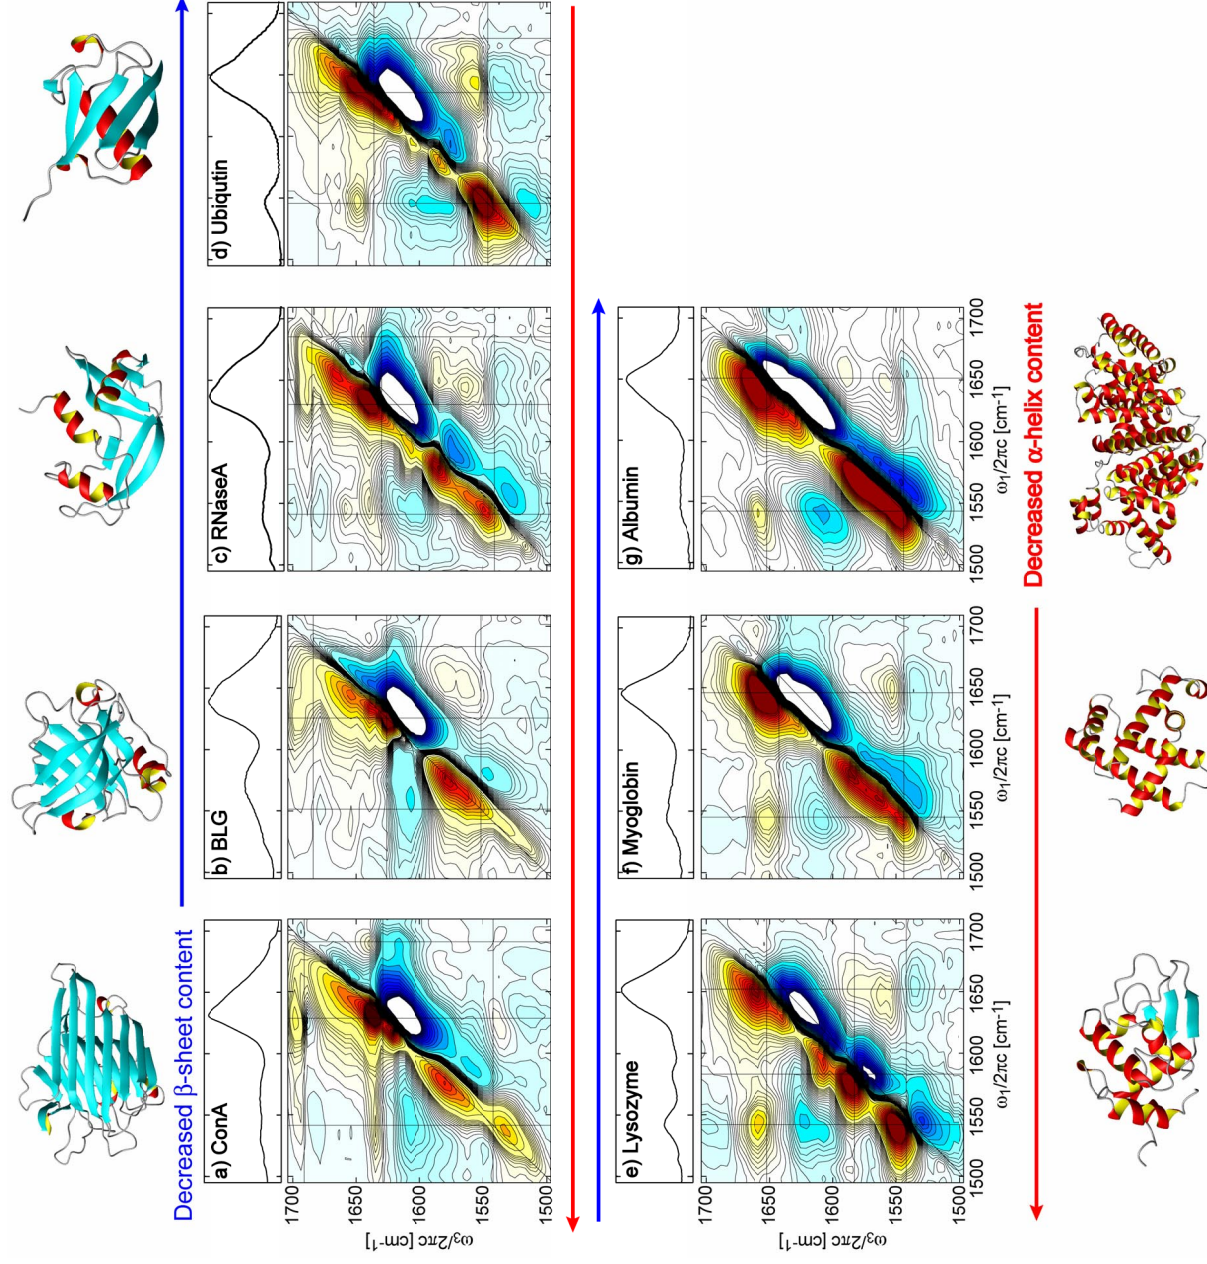

**Figure 1S.** FTIR and absorptive 2D IR spectra of proteins concanavalin A,  $\beta$ -lactoglobulin, ribonuclease A, ubiquitin, lysozyme, myoglobin, and albumin.

Contour levels are plotted to emphasize the cross peak region of the spectra. Contours for Con A, BLG and RNaseA are plotted in 1% increments for  $\pm 8\%$  and 4.3% from  $\pm 8\%$  to  $\pm 60\%$  peak amplitude of the amide I fundamental. Ubiquitin, lysozyme, myoglobin and albumin are plotted with 1.5% increments for  $\pm 12\%$  and 4% from  $\pm 12\%$  to  $\pm 60\%$  peak amplitude of the amide I fundamental.

To confirm the protonation of the peptide groups in amide I/II couplings and the persistence of Arg side chain absorption seen in the 2D IR spectra, consecutive 2DIR spectra of partially and fully exchanged ubiquitin were taken (Figure 2S). The sample was prepared as described above and the partially exchange protein was taken at  $5^\circ\text{C}$ . The sample was then heated to  $65^\circ\text{C}$  at which the protein fully unfolds and left to exchange for 30 minutes. The temperature was then cooled to  $5^\circ\text{C}$  and the fully exchanged spectra was taken (Figure 2Sb). These spectra show the loss of the amide II doublet at  $\omega_1=\omega_3=1550\text{ cm}^{-1}$ . No diagonal or off-diagonal features involving AmII are observed in the fully exchanged spectrum (Figure 2Sb). Additionally, the side chain absorption of symmetric/asymmetric guanidinium vibrations of the Arg near  $\sim 1585\text{ cm}^{-1}$  persist after complete deuteration of the protein.

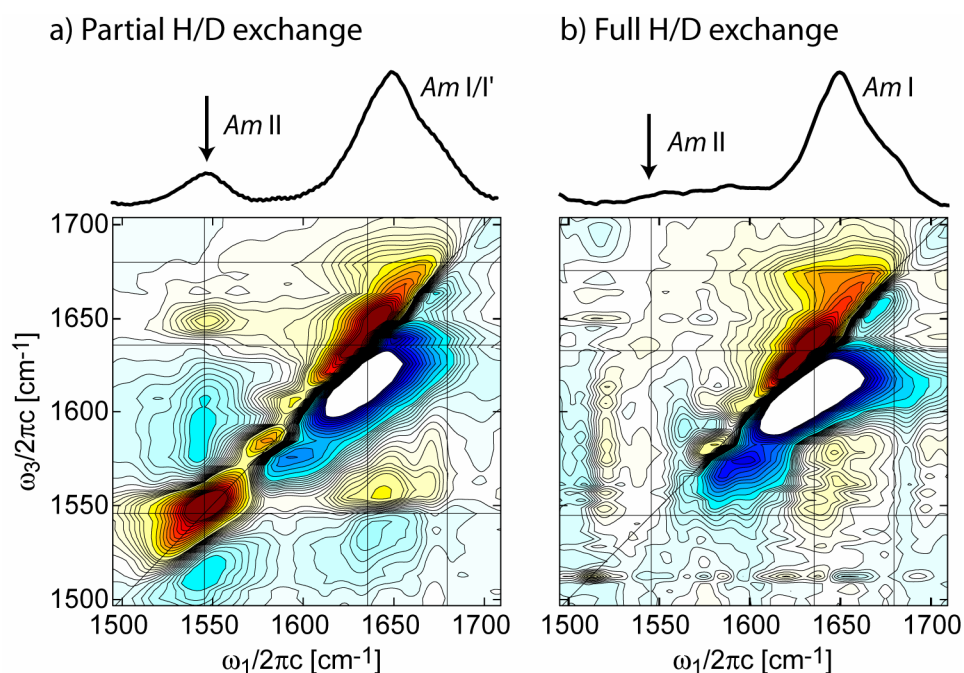

**Figure 2S.** FTIR and 2DIR spectra of Ubiquitin before exchange and after full exchange. Note disappearance of the amide II peak which is only present when the amide mode is protonated.

- (1) Khalil, M.; Demirdoven, N.; Tokmakoff, A. *J. Phys. Chem. A* **2003**, *107*, 5258-5279.
- (2) Golonzka, O.; Khalil, M.; Demirdöven, N.; Tokmakoff, A. *J. Chem. Phys.* **2001**, *115*, 10814-10828.
